# Supplementary material for: An integrated microfluidic electrochemical assay for cervical cancer detection at point-of-care testing
Source: Royal Society of Chemistry journal article supplement (doi:10.1039/d1nr08252c), 2022-01-01
Supplement: d1nr08252c1.pdf [file d1nr08252c1.pdf]

## **An integrated microfluidic electrochemical assay for cervical cancer detection at point-of-care testing**

Fatemeh Keyvani,<sup>†a</sup> Nandini Debnath,<sup>†a</sup> Mahmoud Ayman Saleh<sup>a,b</sup> and Mahla Poudineh\*<sup>a</sup>

<sup>a</sup>. Department of Electrical and Computer Engineering, Faculty of Engineering, University of Waterloo, Waterloo, ON N2L Canada

**This PDF file includes:**

**Table 1.** The sequence of nucleic acids used in this paper.

**Table 2.** Recent studies of hr-HPV DNA detection

**Fig. S1.** Optimizing the shape of structures incorporated inside the micropump.

**Fig. S2.** Flow cytometry measurement for calculating the purity of plasma collected from the PPS device.

**Fig. S3.** The DPV scans before and after incubating with target DNA

**Table S1.** The sequence of nucleic acids used in this paper

| Nucleic acid strand      | Sequence                             |
|--------------------------|--------------------------------------|
| hr-HPV 16 cssDNA (Probe) | GGGCTCTGTCCGGTTCTGCTTGTCCA/3AmMO/    |
| hr-HPV 16 cDNA (Target)  | TGGACAAGCAGAACCGGACAGAGCCC           |
| Cy3-rDNA                 | /5Cy3/GGTGGTGGGGGGGGTTGGTAGGGTGTCTTC |

**Table 2.** Recent studies of hr-HPV DNA detection

| Reference        | Working electrode                                                                                         | Electrochemical technique                        | Medium                                      | Target | LOD     |
|------------------|-----------------------------------------------------------------------------------------------------------|--------------------------------------------------|---------------------------------------------|--------|---------|
| Ref <sup>1</sup> | Polypyrrole (PPy) films and gold nanoparticles (AuNPs)                                                    | Cyclic voltammetry                               | Cervical specimen                           | HPV16  | 13.4 pM |
| Ref <sup>2</sup> | Gold electrode                                                                                            | Differential pulse voltammetry (reduction of MB) | Extracted DNA from cervical swabs           | HPV16  | 18.1 nM |
| Ref <sup>3</sup> | Carbon                                                                                                    | Anthraquinone square wave voltammetry            | Human cancer cell line (PCR amplified)      | HPV16  | 4 nM    |
| Ref <sup>4</sup> | Nanocomposite of reduced graphene oxide(rGO) and multiwalled carbon nanotubes (MWCNTs) + Au nanoparticles | Differential pulse voltammetry                   | Extracted and PCR amplified DNA from cervix | HPV18  | 0.05 fM |
| IMEAC            | Graphene oxide functionalized with cssDNA                                                                 | Differential pulse voltammetry                   | Plasma                                      | HPV16  | 0.48 μM |

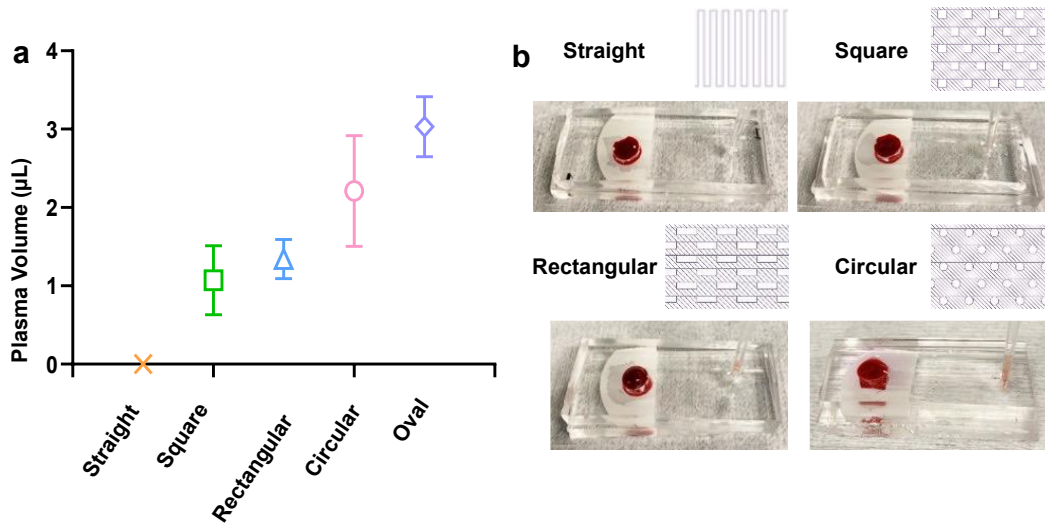

**Fig. S1.** Optimizing the shape of structures incorporated inside the micropump design based on the collected plasma volume.

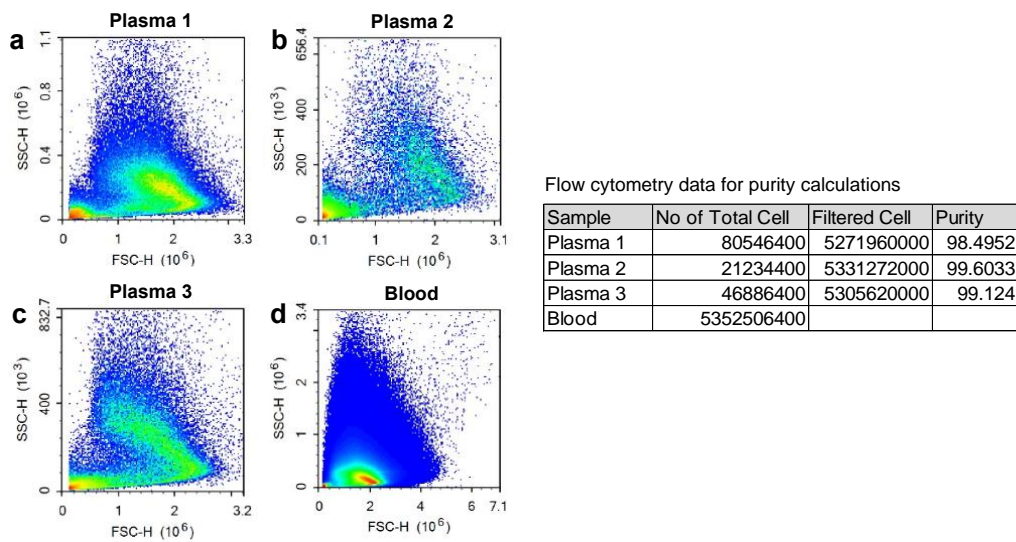

**Fig. S2.** Flow cytometry measurement for calculating the purity of plasma collected from the PPS device.

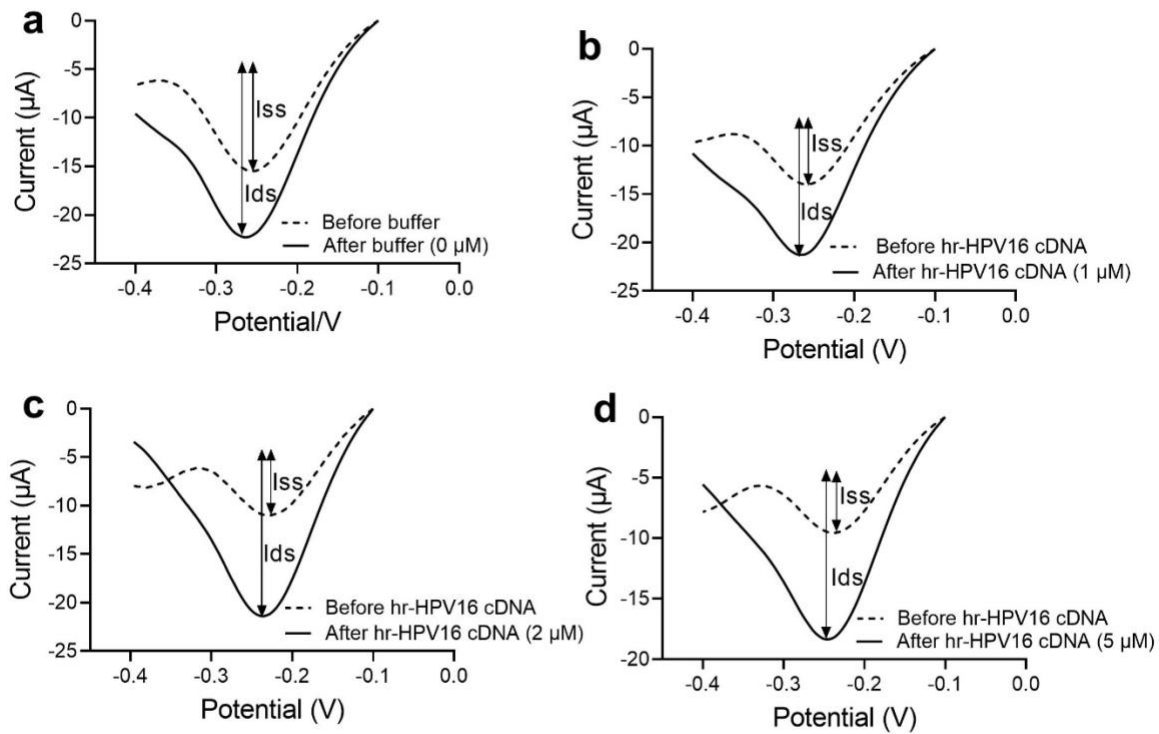

**Fig. S3.** The DPV scans before and after incubating GO-SPCE sensors with 0  $\mu\text{M}$  (a), 1  $\mu\text{M}$  (b), 2  $\mu\text{M}$  (c), and 5  $\mu\text{M}$  (d) of hr-HPV16 cDNA.

## References

1. Avelino, K. Y. P. S., Oliveira, L. S., Lucena-Silva, N., Andrade, C. A. S. & Oliveira, M. D. L. Flexible sensor based on conducting polymer and gold nanoparticles for electrochemical screening of HPV families in cervical specimens. *Talanta* **226**, (2021).
2. Campos-Ferreira, D. S. *et al.* Electrochemical DNA biosensor for human papillomavirus 16 detection in real samples. *Anal. Chim. Acta* **804**, 258–263 (2013).
3. Jampasa, S. *et al.* Electrochemical detection of human papillomavirus DNA type 16 using a pyrrolidinyI peptide nucleic acid probe immobilized on screen-printed carbon electrodes. *Biosens. Bioelectron.* **54**, 428–434 (2014).
4. Mahmoodi, P. *et al.* Early-stage cervical cancer diagnosis based on an ultra-sensitive electrochemical DNA nanobiosensor for HPV-18 detection in real samples. *J. Nanobiotechnology* **18**, 1–12 (2020).
